# Supplementary material for: Ultrasensitive detection of acute myeloid leukemia minimal residual disease using single molecule molecular inversion probes
Source: PubMed Central journal article supplement — Haematologica. 2017 Sep;102(9):1549–57. doi: 10.3324/haematol.2017.169136 (PMC5685235; doi:10.3324/haematol.2017.169136), 2017-09
Supplement: 2017-169136-Disclosures_and_Contributions.pdf [file 2017-169136-Disclosures_and_Contributions.pdf]

Haematologica  
HAEMATOL/2017/169136  
Version 3

Ultrasensitive detection of acute myeloid leukemia minimal residual  
disease using single molecule molecular inversion probes

Adam Waalkes, Kelsi Penewit, Brent L. Wood, David Wu, and Stephen  
J. Salipante

Disclosures: None.

Contributions: AW, KP, SJS performed research. DW, BLW, SJS, AW performed data  
analysis. SJS supervised the study and wrote the manuscript with input from all authors.
